# Supplementary material
Source: PubMed Central journal article supplement (PMC2854872)
Supplement: NIHMS183623-supplement-1_si_001.pdf [file NIHMS183623-supplement-1_si_001.pdf]

# Ultrasensitive Electrochemical Immunosensor for Oral Cancer Biomarker IL-6 using Carbon Nanotube Forest Electrodes and Multilabel Amplification

Ruchika Malhotra, Vyomesh Patel, Jose Pedro Vaqué, J. Silvio Gutkind, and James F. Rusling

## Supplementary Data

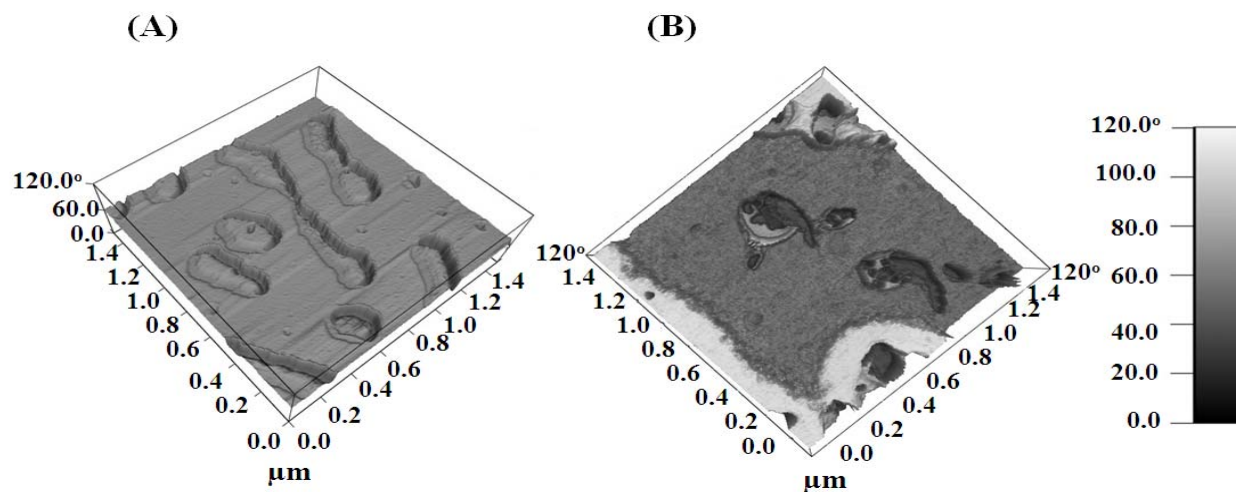

**Figure S1.** Phase contrast AFM images of sonicated, surface carboxylated multiwall CNTs isolated on a smooth freshly cleaved mica surface (A) multiwall CNTs not linked with protein; (B) derivatized as biotin-Ab<sub>2</sub>-MWNT-HRP bioconjugate.

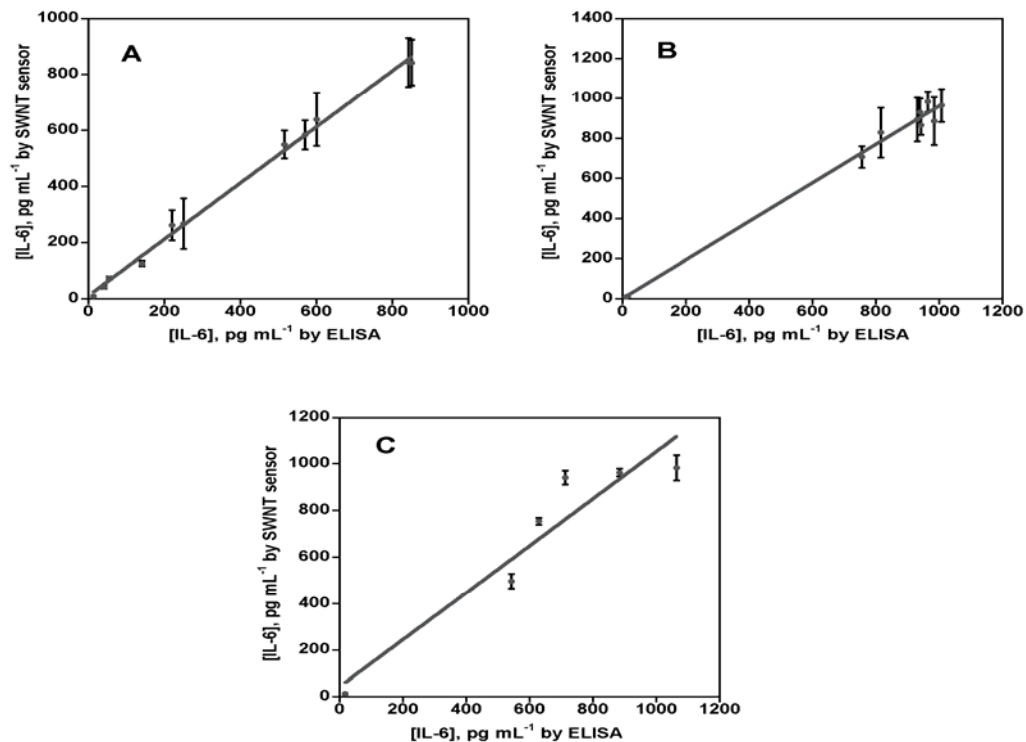

**Figure S2.** Correlation plots of SWNT sensor results for conditioned media samples against results from ELISA determinations for the same samples (A) control conditioned media, (B) representative HNSCC conditioned media, (C) sub-set of representative HNSCC conditioned media.

**Table 1S.** Slopes and Intercepts of correlation plots of SWNT sensor results for conditioned media samples against results from ELISA determinations for the same samples.

| Conditioned media (Fig.)                     | Slope $\pm$ SD  | Intercept $\pm$ SD |
|----------------------------------------------|-----------------|--------------------|
| Control conditioned media (S2A)              | $0.99 \pm 0.02$ | $-10.6 \pm 9.2$    |
| Representative HNSCC conditioned media (S2B) | $1.03 \pm 0.03$ | $4.8 \pm 27.4$     |
| Sub-set HNSCC conditioned media (S2C)        | $0.89 \pm 0.14$ | $18.8 \pm 111.9$   |
